# Supplementary material for: Population homogeneity for the antibody response to COVID-19 BNT162b2/Comirnaty vaccine is only reached after the second dose across all adult age ranges
Source: PubMed Central journal article supplement (PMC8748650; doi:10.1038/s41467-021-27761-z), 2022-01-10
Supplement: 41467_2021_27761_MOESM1_ESM.pdf [file 41467_2021_27761_MOESM1_ESM.pdf]

**Population homogeneity for the antibody response to COVID-19 BNT162b2 / Comirnaty vaccine is only reached after the second dose across all adult age ranges.**

#### Inventory of supporting information

Pdf file containing:

- **Supplemental References** – Reference list for R, R studio, and main package ggplot2 used for data management, graphical design, and statistical analysis (described in Methods section)
- **Supplemental Table 1**- Median and [IQR] for all semi-quantitative data on Ig levels presented in Figures 2-5
- **Supplemental Table 2**- Anti-Spike IgG Positivity in HCW and NHR as in **Figure 2** and stratified by age and sex as in Figure 4
- **Supplemental Table 3**- Median and [IQR] for ECLIA and ELISA data, and corresponding anti-spike IgG positivity at each time point, for HCW participants who contributed samples only at 1 or 2 of the 3 collection times (t0 only, t0 and t1, or t0 and t2)
- **Supplementary Figure 1**- Effect of delayed administration of 2<sup>nd</sup> vaccine dose in the NHR cohort
- **Supplementary Figure 2**- Infections after the 1<sup>st</sup> dose.

## Supplementary References

### Software for data management, graphical design, and statistical analysis

- R, version 4.0.4; GUI 1.74 (*R Core Team (2021). R: A language and environment for statistical computing. R Foundation for Statistical Computing, Vienna, Austria. URL <https://www.R-project.org/>.*)
- RStudio, version 1.1.463; (*RStudio Team (2020). RStudio: Integrated Development for R. RStudio, PBC, Boston, MA URL <http://www.rstudio.com/>.*)
- R package ggplot2, (version 3.3.5); *H. Wickham. ggplot2: Elegant Graphics for Data Analysis. Springer-Verlag New York, 2016. <https://ggplot2.tidyverse.org>*

**Supplemental Table 1.** Median and [IQR] for all semi-quantitative data presented in **Figures 2-5.**

|                    | Anti-N | Age              | n                | t0                 | t1                | t2                |
|--------------------|--------|------------------|------------------|--------------------|-------------------|-------------------|
| HCW<br>Anti-RBD Ig | neg    | 19-69            | 948              | 0.39 [0.39-0.39]   | 63 [23-138]       | 2207 [1238-2500]  |
|                    |        | 19-29            | 171              | 0.39 [0.39-0.39]   | 112 [47-208]      | 2500 [1887-2500]  |
|                    |        | 30-39            | 251              | 0.39 [0.39-0.39]   | 72 [40-157]       | 2393 [1525-2500]  |
|                    |        | 40-49            | 204              | 0.39 [0.39-0.39]   | 51 [17-127]       | 1971 [1171-2500]  |
|                    |        | 50-59            | 216              | 0.39 [0.39-0.39]   | 46 [14-102]       | 1921 [1075-2500]  |
|                    |        | 60-69            | 107              | 0.39 [0.39-0.39]   | 28 [12-85]        | 1599 [997-2500]   |
|                    | pos    | 24-66            | 23               | 35.0 [5.05- 183.9] | 2500 [2500-2500]* | 2500 [2500-2500]* |
| HCW<br>Anti-S IgG  | neg    | 19-69            | 948              | 0.18 [0.15-0.23]   | 1.44 [1.26-1.56]  | 1.83 [1.72-1.92]  |
|                    |        | M                | 197              | 0.18 [0.15-0.22]   | 1.42 [1.15-1.54]  | 1.82 [1.72-1.90]  |
|                    |        | F                | 751              | 0.17 [0.15-0.23]   | 1.44 [1.27-1.57]  | 1.83 [1.72-1.92]  |
|                    |        | 19-29            | 171              | 0.19 [0.16-0.23]   | 1.54 [1.40-1.62]  | 1.87 [1.75-1.94]  |
|                    |        | M                | 31               | 0.21 [0.17-0.30]   | 1.49 [1.35-1.58]  | 1.89 [1.73-1.94]  |
|                    |        | F                | 140              | 0.18 [0.16-0.22]   | 1.55 [1.41-1.62]  | 1.86 [1.76-1.94]  |
|                    |        | 30-39            | 251              | 0.17 [0.15-0.22]   | 1.48 [1.34-1.58]  | 1.83 [1.72-1.92]  |
|                    |        | M                | 51               | 0.18 [0.15-0.21]   | 1.49 [1.29-1.57]  | 1.81 [1.72-1.87]  |
|                    |        | F                | 200              | 0.17 [0.15-0.22]   | 1.47 [1.36-1.58]  | 1.85 [1.72-1.92]  |
|                    |        | 40-49            | 204              | 0.17 [0.14-0.23]   | 1.40 [1.17-1.56]  | 1.83 [1.73-1.90]  |
|                    |        | M                | 41               | 0.16 [0.14-0.21]   | 1.34 [1.13-1.49]  | 1.81 [1.69-1.87]  |
|                    |        | F                | 163              | 0.17 [0.14-0.23]   | 1.41 [1.17-1.56]  | 1.83 [1.74-1.91]  |
|                    |        | 50-59            | 216              | 0.18 [0.15-0.23]   | 1.36 [1.16-1.49]  | 1.83 [1.70-1.90]  |
|                    | M      | 45               | 0.18 [0.15-0.23] | 1.35 [1.07-1.46]   | 1.85 [1.74-1.91]  |                   |
| F                  | 171    | 0.17 [0.15-0.23] | 1.37 [1.17-1.49] | 1.83 [1.70-1.89]   |                   |                   |
| 60-69              | 107    | 0.17 [0.15-0.23] | 1.30 [1.00-1.53] | 1.81 [1.71-1.89]   |                   |                   |
| M                  | 29     | 0.18 [0.15-0.21] | 1.03 [0.63-1.49] | 1.83 [1.74-1.89]   |                   |                   |
| F                  | 77     | 0.17 [0.15-0.24] | 1.36 [1.21-1.56] | 1.79 [1.70-1.89]   |                   |                   |
| pos                | 24-66  | 23               | 0.94 [0.61-1.41] | 1.85 [1.72-1.95]   | 1.91 [1.80-2.02]  |                   |
| NHR<br>Anti-S IgG  | n/a    | 70-99            | 118              | 0.20 [0.16-0.26]   | 0.50 [0.35-1.06]  | 1.83 [1.68-1.96]  |
|                    |        | M                | 31               | 0.21 [0.16-0.26]   | 0.48 [0.36-1.16]  | 1.80 [1.62-1.84]  |
|                    |        | F                | 87               | 0.20 [0.16-0.27]   | 0.52 [0.34-0.91]  | 1.85 [1.71-1.98]  |
|                    |        | 70-85            | 51               | 0.20 [0.16-0.27]   | 0.53 [0.42-1.21]  | 1.83 [1.69-1.91]  |
|                    |        | M                | 18               | 0.23 [0.17-0.26]   | 0.51 [0.46-1.26]  | 1.81 [1.64-1.88]  |
|                    |        | F                | 33               | 0.19 [0.16-0.28]   | 0.53 [0.41-1.18]  | 1.83 [1.69-1.94]  |
|                    |        | 86-99            | 66               | 0.20 [0.16-0.26]   | 0.46 [0.30-0.85]  | 1.84 [1.69, 1.97] |
|                    |        | M                | 13               | 0.20 [0.16-0.25]   | 0.36 [0.26-0.95]  | 1.78 [1.63-1.81]  |
| F                  | 53     | 0.21 [0.16-0.26] | 0.48 [0.31-0.79] | 1.87 [1.72-1.98]   |                   |                   |
| HCW<br>Anti-S IgM  | neg    | 19-69            | 949              | 0.62 [0.47-0.83]   | 0.92 [0.70-1.20]  | 0.95 [0.71-1.28]  |
|                    |        | 19-29            | 173              | 0.69 [0.51-0.89]   | 0.99 [0.83-1.35]  | 1.03 [0.78-1.32]  |
|                    |        | 30-39            | 251              | 0.68 [0.54-0.89]   | 0.99 [0.90-1.27]  | 0.98 [0.75-1.31]  |
|                    |        | 40-49            | 203              | 0.64 [0.46-0.86]   | 0.91 [0.68-1.17]  | 0.93 [0.70-1.31]  |
|                    |        | 50-59            | 217              | 0.56 [0.43-0.74]   | 0.86 [0.66-1.12]  | 0.90 [0.65-1.20]  |
|                    |        | 60-69            | 107              | 0.50 [0.39-0.66]   | 0.72 [0.54-0.98]  | 0.85 [0.58-1.24]  |
|                    | pos    | 24-66            | 23               | 0.87 [0.63-1.07]   | 0.99 [0.75-1.41]  | 0.82 [0.73-1.18]  |
| NHR<br>Anti-S IgM  | n/a    | 70-99            | 118              | 0.43 [0.30-0.53]   | 0.36 [0.24-0.48]  | 0.39 [0.26-0.58]  |
|                    |        | 70-85            | 51               | 0.42 [0.32-0.51]   | 0.36 [0.26-0.48]  | 0.39 [0.28-0.48]  |
|                    |        | 86-99            | 66               | 0.43 [0.28-0.56]   | 0.34 [0.22-0.48]  | 0.40 [0.24-0.65]  |
| HCW<br>Anti-S IgA  | neg    | 19-69            | 949              | 0.45 [0.33-0.63]   | 1.11 [0.91-1.23]  | 1.08 [0.99-1.19]  |
|                    |        | 19-29            | 173              | 0.43 [0.30-0.59]   | 1.11 [0.93-1.24]  | 1.07 [0.94-1.17]  |
|                    |        | 30-39            | 251              | 0.45 [0.35-0.62]   | 1.12 [0.97-1.24]  | 1.07 [0.99-1.16]  |
|                    |        | 40-49            | 203              | 0.47 [0.34-0.61]   | 1.13 [0.90-1.24]  | 1.09 [0.98-1.22]  |
|                    |        | 50-59            | 217              | 0.45 [0.33-0.65]   | 1.08 [0.86-1.22]  | 1.10 [1.01-1.20]  |
|                    |        | 60-69            | 107              | 0.45 [0.32-0.65]   | 1.11 [0.88-1.20]  | 1.10 [1.04-1.27]  |
|                    | pos    | 24-66            | 23               | 0.74 [0.60-0.95]   | 1.54 [1.30-1.95]  | 1.33 [1.10-1.61]  |
| NHR<br>Anti-S IgA  | n/a    | 70-99            | 118              | 0.63 [0.44-0.86]   | 0.81 [0.53-1.09]  | 1.13 [0.96-1.39]  |
|                    |        | 70-85            | 51               | 0.64 [0.47-0.89]   | 0.82 [0.59-1.12]  | 1.15 [1.02-1.36]  |
|                    |        | 86-99            | 66               | 0.62 [0.43-0.80]   | 0.75 [0.50-1.07]  | 1.12 [0.94-1.37]  |

\* When determined on 1/50 dilution of samples, t1 10743 [7560-15838], t2 15341 [8378-23593]\*

**Supplemental Table 2.** Anti-Spike IgG Positivity in HCW and NHR as in **Figure 2** and stratified by age and sex as in **Figure 4**

|        |     | Positivity; n (%; 95% CI) |                    |                       |                        |
|--------|-----|---------------------------|--------------------|-----------------------|------------------------|
| Anti-N | Age | n                         | t1                 | t2                    |                        |
| HCW    | neg | 19-69                     | 948                | 845 (89.1;86.9-91.0)  | 947 (99.9; 99.3-100.0) |
|        |     | M                         | 197                | 166 (84.3; 78.4-88.7) | 196 (99.5; 96.4-99.9)  |
|        |     | F                         | 751                | 679 (90.4; 88.1-92.3) | 751 (100; 99.5-100)    |
|        |     | 19-29                     | 171                | 168 (98.2; 94.6-99.4) | 171 (100; 97.8-100)    |
|        |     | M                         | 31                 | 30 (96.8; 78.4-99.6)  | 31 (100; 89.0-100)     |
|        |     | F                         | 140                | 138 (98.6; 94.4-99.6) | 140 (100; 97.3-100)    |
|        |     | 30-39                     | 251                | 241 (96; 92.7-97.9)   | 251 (100; 98.5-100)    |
|        |     | M                         | 51                 | 50 (98; 86.6-99.7)    | 51 (100; 93.0-100)     |
|        |     | F                         | 200                | 191 (95.5; 91.5-97.7) | 200 (100; 98.1-100)    |
|        |     | 40-49                     | 204                | 175 (85.8; 80.2-90.0) | 204 (100; 98.1-100)    |
|        |     | M                         | 41                 | 33 (80.5; 64.8-90.2)  | 41 (100; 91.4-100)     |
|        |     | F                         | 163                | 142 (87.1; 81.0-91.5) | 163 (100; 97.7-100)    |
|        |     | 50-59                     | 216                | 182 (84.3; 78.7-88.6) | 215 (99.5; 96.7-99.9)  |
|        |     | M                         | 45                 | 37 (82.2; 67.6-91.1)  | 44 (97.8; 84.9-99.7)   |
|        |     | F                         | 171                | 145 (84.8; 78.5-89.5) | 171 (100; 97.8-100)    |
|        |     | 60-69                     | 106                | 79 (74.5; 65.2-82.0)  | 106 (100; 96.5-100)    |
|        |     | M                         | 29                 | 16 (55.2; 36.1-72.86) | 29 (100; 88.3-100)     |
| F      | 77  | 63 (81.8; 71.3-89.0)      | 77 (100; 95.3-100) |                       |                        |
|        | pos | 24-66                     | 23                 | 22 (95.7; 79.0-99.2)  | 23 (100; 85.7-100)     |
| NHR    | n/a | 70-99                     | 118                | 30 (25.4; 18.4-34.0)  | 112 (94.9; 89.4-98.0)  |
|        |     | M                         | 31                 | 9 (29; 16.1-46.6)     | 28 (90.3; 75.1-96.7)   |
|        |     | F                         | 87                 | 21 (24.1; 16.4-34.1)  | 84 (96.6; 90.3-98.8)   |
|        |     | 70-85                     | 51                 | 15 (29.4; 18.3-43.7)  | 49 (96.1; 85.0-99.1)   |
|        |     | M                         | 18                 | 6 (33.3; 14.4-59.7)   | 17 (94.4; 64.5-99.4)   |
|        |     | F                         | 33                 | 9 (27.3; 14.3-20.3)   | 32 (97.0; 80.0-99.6)   |
|        |     | 86-99                     | 66                 | 14 (25.4; 18.4-34.0)  | 62 (93.4; 84.6-97.8)   |
|        |     | M                         | 13                 | 3 (23.1; 6.3-57.2)    | 11 (84.6; 49.0-96.9)   |
|        |     | F                         | 53                 | 11 (20.8; 11.7-34.2)  | 51 (96.2; 85.6-99.1)   |

**Supplemental Table 3.** Median and [IQR] for ECLIA and ELISA data, and corresponding anti-spike IgG positivity at each time point, for HCW participants who contributed samples only at 1 or 2 of the 3 collection times (t0 only, t0 and t1, or t0 and t2).

|                                 | t0 (n=220)        | t1 (n=79)             | t2 (n=61)             |
|---------------------------------|-------------------|-----------------------|-----------------------|
| <b>median [IQR]</b>             |                   |                       |                       |
| Anti-RBD Ig                     | 0.39 [0.39-0.39]  | 75.72 [34.66-152.55]  | 2500 [1355-2500]      |
| Anti-S IgG                      | 0.18 [0.15-0.23]  | 1.47 [1.35-1.56]      | 1.79 [1.72-1.93]      |
| Anti-S IgM                      | 0.67 [0.52-0.86]  | 0.96 [0.72-1.22]      | 0.88 [0.69-1.17]      |
| Anti-S IgA                      | 0.48 [0.35-0.69]  | 1.16 [1.01-1.31]      | 1.09 [0.93-1.15]      |
| <b>Positivity; n (%; 95 CI)</b> |                   |                       |                       |
| Anti-S IgG                      | 9 (4.1%; 2.2-7.6) | 77 (97.5%; 91.2-99.3) | 61 (98.4%; 91.3-99.7) |

**Supplementary Figure S1.**

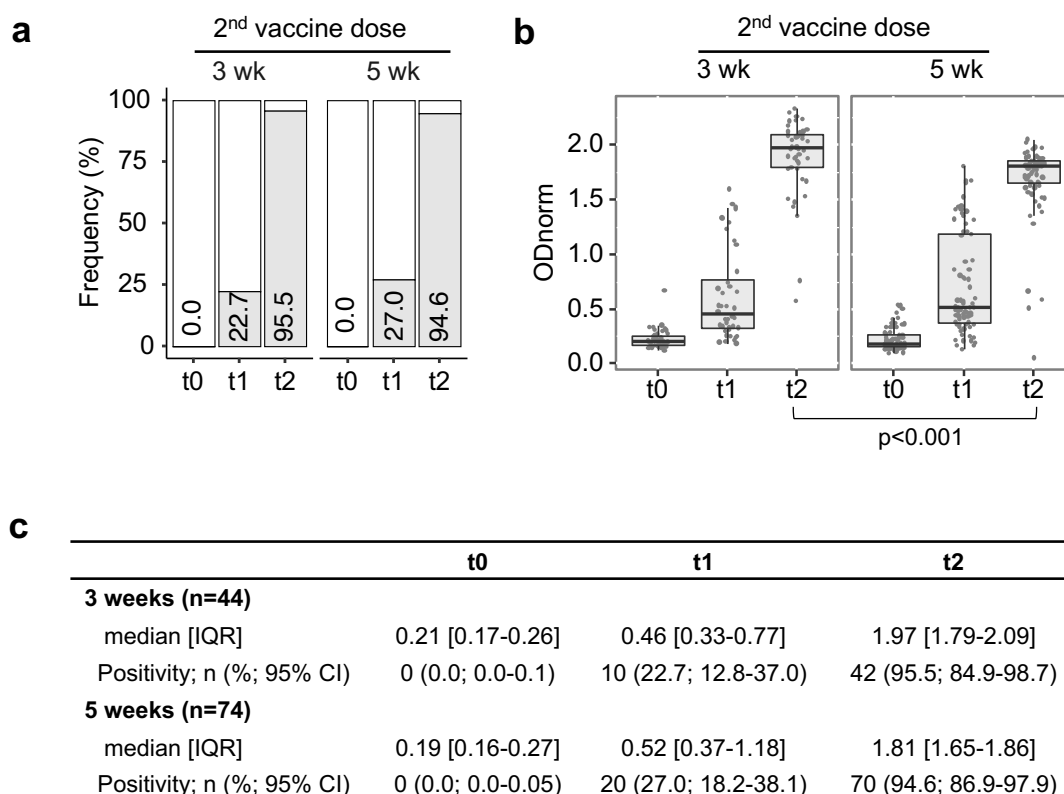

**Supplementary Figure S1: Effect of delayed administration of 2<sup>nd</sup> vaccine dose in the NHR cohort.**

The 2<sup>nd</sup> vaccine dose was administered 3 weeks (n=44 participants), or 5 weeks (n=74 participants) after the 1<sup>st</sup> dose. Shown are reanalysis of the data for anti-spike IgG (ELISA) presented in Fig.1C, now partitioned according to the time to the 2<sup>nd</sup> vaccine dose in weeks (wk). **a)** Seroconversion defined by frequency of samples testing positive (grey bars) at the indicated time point. Respective values are indicated inside each bar. **b)** Semi-quantitative measurements. Data points represent individual participants, boxes denote interquartile range, horizontal line represent the median, and whiskers denote the minimum and maximum values below or above the median at 1.5 times the interquartile range. Wilcoxon rank sum test, two-sided, revealed a significant difference between groups at t2  $p=2.7927 \times 10^{-05}$ , but not at t1  $p=0.32340e$ . **c)** Table displaying anti-spike IgG ODnorm (Median and [IQR]) and positivity, and measured at t0, t1 and t2. Source data are provided as a Source Data file.

**Supplementary Figure S2.**

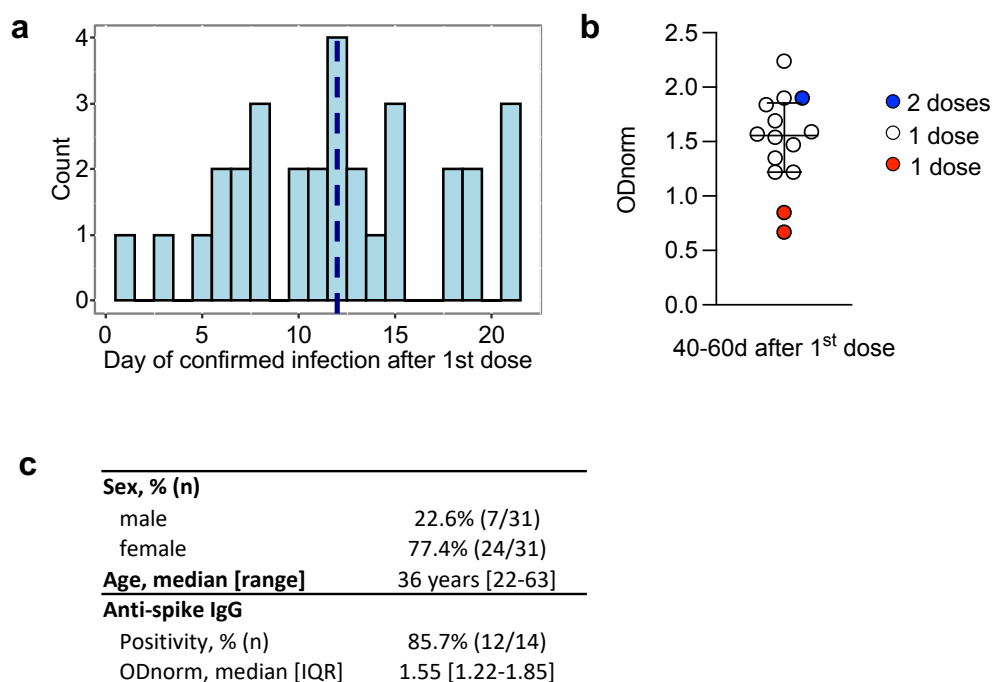

**Supplementary Figure S2. Infections after the 1<sup>st</sup> dose.** 31 participants were diagnosed COVID-19 after the 1<sup>st</sup> vaccination, 14/31 contributed sera post-infection. **a)** Histogram of participants (n=31) who got infected with SARS-CoV-2 after the 1<sup>st</sup> vaccine dose, as determined by a positive qPCR test between t0 and t1. Dashed line represents median day of infection after 1<sup>st</sup> dose (t0). 24/31 (77.4%) of the infected participants, were diagnosed in the first 15 days after the 1<sup>st</sup> dose. **b)** Anti-spike IgG ODnorm measured 40-60 days after the 1<sup>st</sup> vaccine dose in participants infected during the first 4 weeks after receiving the 1<sup>st</sup> dose (n=14). Data points represent individual participants, major horizontal line represent the median, and whiskers denote interquartile range. Highlighted are 2 non-responders (red circles), and 1 participant who received 2 vaccine doses (blue circle). **c)** Table indicating sex and age distribution (upper part), and anti-spike IgG positivity, as well as ODnorm median and [IQR], both measured 40-60 days after the 1<sup>st</sup> dose (lower part). Source data are provided as a Source Data file.
